# Supplementary material for: The Highly Conserved Codon following the Slippery Sequence Supports −1 Frameshift Efficiency at the HIV-1 Frameshift Site
Source: PLoS One. 2015 Mar 25;10(3):e0122176. doi: 10.1371/journal.pone.0122176 (PMC4373837; doi:10.1371/journal.pone.0122176)
Supplement: S7 File — A: Stop codon readthrough. Values for Renilla luciferase (Rluc) and firefly luciferase (Luc+) are in relative light units. Background (bkgd) values (cell lysate alone) were subtracted from each measurement. The percentage of readthrough for each sample was calculated using the corresponding average readthrough control from each replicate plate. Replicates are from one experiment. Values in bold italics were not included as they were greater than two standard deviations above or below the mean. CAG was the UAA readthrough control, UAU the UAG readthrough control, and UGG the UGA readthrough control. ser, serine tRNA; oc, ochre (UAA suppressor tRNA); am, amber (UAG suppressor tRNA); op, opal (UGA suppressor tRNA). B: Antizyme frameshifting. Values for Renilla luciferase (Rluc) and firefly luciferase (Luc+) are in relative light units. Background (bkgd) values (cell lysate alone) were subtracted from each measurement. The relative frameshift efficiency for each sample was calculated using the corresponding average readthrough control (RT) from each replicate plate. Replicates are from one experiment. The value in bold italics was not included as it was greater than two standard deviations above the mean. Az, antizyme; ser, serine tRNA; am, amber (UAG suppressor tRNA); op, opal (UGA suppressor tRNA). C: HIV frameshifting. Values for Renilla luciferase (Rluc) and firefly luciferase (Luc+) are in relative light units. Background (bkgd) values (cell lysate alone) were subtracted from each measurement. The relative frameshift efficiency for each sample was calculated using the corresponding average readthrough control (RT) from each replicate plate. Replicates are from one experiment. The value in bold italics was not included as it was greater than two standard deviations above the mean. ser, serine tRNA; am, amber (UAG suppressor tRNA); op, opal (UGA suppressor tRNA). (XLSX) [file pone.0122176.s010.xlsx]

## Sheet: Sheet1
Fig 6A: Stop codon readthrough
Sample	Rluc bkgd	Rluc	Rluc - bkgd	Luc+ bkgd	Luc+	Luc+ - bkgd	Ratio		Rel ratio group	Average	SD	SEM
UAA/ser 1	230	2641405	2641175	79	210	131	0.00495991		0.0105021	0.0188466	0.00915315	0.00457658
UAA/ser 2	192	3626903	3626711	118	610	492	0.013566		0.0287247
UAA/ser 3	213	3474812	3474599	116	307	191	0.00549704		0.0116395
UAA/ser 4	247	4171115	4170868	108	591	483	0.0115803		0.0245202
UAG/ser 1	158	369488	369330	83	145	62	0.0167872		0.0351438	0.0309899	0.00806091	0.00465397
UAG/ser 2	174	322180	322006	113	259	146	0.0453408		0.0949207
UAG/ser 3	230	550152	549922	105	162	57	0.0103651		0.0216993
UAG/ser 4	215	724575	724360	133	258	125	0.0172566		0.0361267
UGA/ser 1	164	4744191	4744027	180	1329	1149	0.0242199		0.0480121	0.0546796	0.0107132	0.0053566
UGA/ser 2	207	6262996	6262789	101	2054	1953	0.0311842		0.0618176
UGA/ser 3	514	6209785	6209271	262	1618	1356	0.0218383		0.0432909
UGA/ser 4	219	6143853	6143634	185	2218	2033	0.0330912		0.0655979
CAG/ser 1	188	6924571	6924383	92	2786821	2786729	40.2452	47.2276
CAG/ser 2	162	5599275	5599113	121	2434597	2434476	43.4797
CAG/ser 3	263	6620399	6620136	144	3053718	3053574	46.1255
CAG/ser 4	339	7599634	7599295	202	4488355	4488153	59.0601
UAU/ser 1	147	2939558	2939411	135	1407758	1407623	47.8879	47.767
UAU/ser 2	174	2181374	2181200	101	993494	993393	45.5434
UAU/ser 3	327	2671973	2671646	120	3220002	3219882	120.521
UAU/ser 4	200	2265900	2265700	169	1130065	1129896	49.8696
UGG/ser 1	134	4858631	4858497	87	2471125	2471038	50.8601	50.4455
UGG/ser 2	193	7599836	7599643	150	5052662	5052512	66.4835
UGG/ser 3	204	5549442	5549238	115	2844612	2844497	51.2592
UGG/ser 4	226	9812817	9812591	142	3255865	3255723	33.179
UAA/oc 1	387	2468554	2468167	87	108102	108015	4.37632		7.53933	9.54395	1.80795	1.04382
UAA/oc 2	183	2548297	2548114	166	163621	163455	6.41474		11.051
UAA/oc 3	200	3326949	3326749	85	193993	193908	5.82875		10.0415
UAA/oc 4	266	3575867	3575601	143	76392	76249	2.13248		3.67374
UAG/oc 1	183	259857	259674	89	162	73	0.0281122		0.0505041	0.0592606	0.0453444	0.0261796
UAG/oc 2	193	252919	252726	187	162	-25	-0.00989214		-0.0177714
UAG/oc 3	248	321930	321682	151	345	194	0.060308		0.108345
UAG/oc 4	261	474703	474442	137	187	50	0.0105387		0.018933
UGA/oc 1	192	4205018	4204826	116	948	832	0.0197868		0.043318	0.103218	0.0831654	0.0415827
UGA/oc 2	656	3705684	3705028	123	3745	3622	0.097759		0.214018
UGA/oc 3	185	4984158	4983973	208	1014	806	0.0161718		0.035404
UGA/oc 4	217	6407677	6407460	160	3676	3516	0.0548735		0.120131
CAG/oc 1	195	5981705	5981510	97	3889556	3889459	65.0247	58.0466
CAG/oc 2	166	4529397	4529231	105	2944941	2944836	65.0185
CAG/oc 3	512	6584550	6584038	148	2903489	2903341	44.0967
CAG/oc 4	189	5461553	5461364	163	8200154	8199991	150.145
UAU/oc 1	231	2390681	2390450	132	1226710	1226578	51.3116	55.6631
UAU/oc 2	256	1944555	1944299	143	2552571	2552428	131.278
UAU/oc 3	239	1686585	1686346	136	1144726	1144590	67.874
UAU/oc 4	172	2408788	2408616	169	1151579	1151410	47.8038
UGG/oc 1	197	5725742	5725545	107	2546612	2546505	44.4762	45.6779
UGG/oc 2	195	4986504	4986309	114	2237868	2237754	44.878
UGG/oc 3	267	6340910	6340643	171	3325491	3325320	52.4445
UGG/oc 4	252	6720846	6720594	141	2749742	2749601	40.9131
UAA/am 1	331	1415354	1415023	112	417	305	0.0215544		0.0176251	0.0114915	0.00484658	0.00242329
UAA/am 2	256	1195228	1194972	123	270	147	0.0123015		0.010059
UAA/am 3	200	2030614	2030414	136	441	305	0.0150216		0.0122832
UAA/am 4	283	2712808	2712525	211	410	199	0.00733634		0.00599893
UAG/am 1	157	66599	66442	98	6235	6137	9.23663		16.0196	13.7448	4.14563	2.39348
UAG/am 2	256	51406	51150	114	4908	4794	9.37243		16.2551
UAG/am 3	191	64321	64130	130	3443	3313	5.16607		8.95978
UAG/am 4	275	120826	120551	143	21271	21128	17.5262		30.3966
UGA/am 1	196	1603691	1603495	211	1160	949	0.0591832		0.104809	0.0832777	0.0219225	0.0109612
UGA/am 2	180	1768862	1768682	155	990	835	0.0472103		0.0836055
UGA/am 3	498	1720632	1720134	291	807	516	0.0299977		0.0531234
UGA/am 4	186	3109866	3109680	250	1858	1608	0.0517095		0.0915732
CAG/am 1	179	3702261	3702082	98	2977955	2977857	80.4374	122.294
CAG/am 2	248	3395909	3395661	141	3243444	3243303	95.5132
CAG/am 3	267	3714666	3714399	146	6285226	6285080	169.209
CAG/am 4	181	4817051	4816870	156	6937268	6937112	144.017
UAU/am 1	201	2242294	2242093	94	1336207	1336113	59.5922	57.6585
UAU/am 2	236	243	7	111	137	26	371.429
UAU/am 3	233	1660700	1660467	179	769392	769213	46.3251
UAU/am 4	232	1732813	1732581	158	1161993	1161835	67.058
UGG/am 1	257	5636245	5635988	186	4778545	4778359	84.783	56.4679
UGG/am 2	236	6781415	6781179	94	3076110	3076016	45.3611
UGG/am 3	459	6395671	6395212	203	2869722	2869519	44.8698
UGG/am 4	219	6780471	6780252	124	3448416	3448292	50.8579
UAA/op 1	234	2693906	2693672	102	481	379	0.01407		0.029829	0.0153726	0.00970533	0.00485267
UAA/op 2	238	2510728	2510490	227	371	144	0.00573593		0.0121604
UAA/op 3	343	3740690	3740347	119	288	169	0.0045183		0.00957897
UAA/op 4	156	4487239	4487083	104	314	210	0.0046801		0.009922
UAG/op 1	144	877481	877337	94	181	87	0.00991637		0.0186617	0.0149605	0.00794151	0.00397075
UAG/op 2	217	682740	682523	116	149	33	0.004835		0.00909902
UAG/op 3	314	830255	829941	163	197	34	0.00409668		0.00770956
UAG/op 4	221	1428732	1428511	145	330	185	0.0129505		0.0243717
UGA/op 1	231	6153282	6153051	103	415557	415454	6.752		17.1489	16.1095	2.99151	1.72715
UGA/op 2	221	5203329	5203108	109	377929	377820	7.26143		18.4428
UGA/op 3	233	5785942	5785709	183	290331	290148	5.01491		12.737
UGA/op 4	322	8351980	8351658	111	1238333	1238222	14.8261		37.6556
CAG/op 1	321	9358581	9358260	169	4492032	4491863	47.9989	47.1689
CAG/op 2	192	8276570	8276378	123	3375011	3374888	40.7774
CAG/op 3	289	10438597	10438308	144	4654811	4654667	44.5922
CAG/op 4	203	11788860	11788657	127	6520115	6519988	55.3073
UAU/op 1	221	1863978	1863757	137	980488	980351	52.6008	53.1376
UAU/op 2	205	1540435	1540230	135	1048596	1048461	68.0717
UAU/op 3	204	1769740	1769536	154	935101	934947	52.8357
UAU/op 4	210	2462685	2462475	120	961526	961406	39.0423
UGG/op 1	186	10763589	10763403	125	4637576	4637451	43.0854	39.3728
UGG/op 2	312	9345603	9345291	128	4296772	4296644	45.9766
UGG/op 3	324	11087559	11087235	140	4249976	4249836	38.3309
UGG/op 4	234	13990500	13990266	163	4211008	4210845	30.0984

## Sheet: Sheet2
Fig 6B: Antizyme frameshifting
Sample	Rluc bkgd	Rluc	Rluc - bkgd	Luc+ bkgd	Luc+	Luc+ - bkgd	Ratio		Rel ratio group	Av	SD	SEM
Az/ser 1.0 1	390	3259971	3259581	76	414010	413934	12.699		17.3508	22.8667	4.09491	2.04746
Az/ser 1.0 2	353	2828792	2828439	107	463773	463666	16.393		22.3979
Az/ser 1.0 3	149	2734804	2734655	109	486221	486112	17.776		24.9236
Az/ser 1.0 4	111	2687465	2687354	157	513724	513567	19.1105		26.7947
Az/am 1.0 1	229	1829159	1828930	235	255143	254908	13.9375		19.6375	25.1279	9.81589	4.90794
Az/am 1.0 2	177	1439097	1438920	99	346962	346863	24.1058		33.9642
Az/am 1.0 3	147	1625316	1625169	207	598662	598455	36.8242		32.8154
Az/am 1.0 4	196	1711587	1711391	111	270792	270681	15.8164		14.0946
Az/op 1.0 1	303	2164941	2164638	147	915348	915201	42.2796		47.3836	8.68549	0.202336	0.116819
Az/op 1.0 2	132	2024303	2024171	172	160318	160146	7.91168		8.86678
Az/op 1.0 3	265	2178411	2178146	160	172326	172166	7.90425		8.72249
Az/op 1.0 4	236	1898068	1897832	97	145716	145619	7.67291		8.46721
RT/ser 1.0 1	163	3512773	3512610	76	2612206	2612130	74.3644	73.1898
RT/ser 1.0 2	143	5004947	5004804	238	3604461	3604223	72.0153
RT/ser 1.0 3	176	3299317	3299141	182	2418149	2417967	73.2908	71.322
RT/ser 1.0 4	123	2615996	2615873	138	1814331	1814193	69.3533
RT/am 1.0 1	141	2006684	2006543	102	1460498	1460396	72.7817	70.9742
RT/am 1.0 2	97	1478692	1478595	133	1022828	1022695	69.1667
RT/am 1.0 3	188	1118014	1117826	279	1124196	1123917	100.545	112.216
RT/am 1.0 4	136	1412315	1412179	144	1749657	1749513	123.887
RT/op 1.0 1	125	1758859	1758734	165	1784941	1784776	101.481	89.2284
RT/op 1.0 2	295	2390199	2389904	125	1839780	1839655	76.9761
RT/op 1.0 3	174	1697550	1697376	175	1615616	1615441	95.1728	90.6191
RT/op 1.0 4	146	2156992	2156846	160	1856459	1856299	86.0654

## Sheet: Sheet3
Fig 6C: HIV frameshifting
GGG serine:
Sample	Rluc bkgd	Rluc	Rluc - bkgd	Luc+ bkgd	Luc+	Luc+ - bkgd	Ratio		Rel ratio group	Av	SD	SEM
GGG/ser 0.5 1	253	2128588	2128335	190	565771	565581	26.5739		12.0377	10.438	1.41804	0.70902
GGG/ser 0.5 2	126	1207397	1207271	185	296554	296369	24.5487		11.1203
GGG/ser 0.5 3	129	3401329	3401200	122	664402	664280	19.5308		8.84721
GGG/ser 0.5 4	134	2419496	2419362	110	520686	520576	21.5171		9.74699
RT/ser 0.5 1	258	4479314	4479056	113	9854574	9854461	220.012	220.756
RT/ser 0.5 2	402	3130004	3129602	162	6813033	6812871	217.691
RT/ser 0.5 3	108	4072287	4072179	119	8553271	8553152	210.039
RT/ser 0.5 4	150	3637134	3636984	123	8557321	8557198	235.283
GGG amber, GGG opal:
Sample	Rluc bkgd	Rluc	Rluc - bkgd	Luc+ bkgd	Luc+	Luc+ - bkgd	Ratio
GGG/am 0.5 1	67	4498537	4498470	87	656998	656911	14.603		10.9652	8.97921	1.42883	0.714415
GGG/am 0.5 2	96	5438209	5438113	97	564288	564191	10.3748		7.79028
GGG/am 0.5 3	99	3530801	3530702	105	381286	381181	10.7962		8.10672
GGG/am 0.5 4	112	3254766	3254654	94	392559	392465	12.0586		9.05464
GGG/op 0.5 1	140	5329005	5328865	112	622664	622552	11.6826		10.2783	11.167	0.964548	0.556882
GGG/op 0.5 2	209	3658717	3658508	127	882017	881890	24.1052		21.2076
GGG/op 0.5 3	100	6029528	6029428	93	756000	755907	12.537		11.03
GGG/op 0.5 4	103	3213875	3213772	94	445479	445385	13.8586		12.1928
RT/am 0.5 1	158	3245065	3244907	135	5637222	5637087	173.721	133.176
RT/am 0.5 2	102	4333581	4333479	115	4503606	4503491	103.923
RT/am 0.5 3	162	3264668	3264506	115	4454544	4454429	136.45
RT/am 0.5 4	104	2696589	2696485	76	3198330	3198254	118.608
RT/op 0.5 1	124	5248159	5248035	101	8262805	8262704	157.444	113.663
RT/op 0.5 2	119	8178413	8178294	223	8069145	8068922	98.6627
RT/op 0.5 3	125	7377514	7377389	124	7875532	7875408	106.751
RT/op 0.5 4	84	6929088	6929004	122	6360539	6360417	91.7941
UGA & UGA_U:
Sample	Rluc bkgd	Rluc	Rluc - bkgd	Luc+ bkgd	Luc+	Luc+ - bkgd	Ratio
UGA/ser 1	120	5569235	5569115	104	287631	287527	5.16288		2.68569	2.55117	0.357837	0.146086
UGA/ser 2	189	7555908	7555719	100	345091	344991	4.56596		2.37517
UGA/ser 3	123	5890585	5890462	106	328246	328140	5.5707		2.89783
UGA/ser 4	116	8633050	8632934	90	332432	332342	3.8497		2.00258
UGA/ser 5	167	8554788	8554621	124	483256	483132	5.64761		2.93784
UGA/ser 6	122	6250234	6250112	143	289452	289309	4.62886		2.40789
UGA_U/ser 1	114	4829875	4829761	138	206919	206781	4.28139		2.22714	2.13525	0.381979	0.155942
UGA_U/ser 2	108	7122239	7122131	108	309028	308920	4.33747		2.25631
UGA_U/ser 3	122	4067649	4067527	135	217655	217520	5.34772		2.78184
UGA_U/ser 4	125	4284428	4284303	164	139878	139714	3.26107		1.69638
UGA_U/ser 5	129	5238579	5238450	172	187943	187771	3.58448		1.86461
UGA_U/ser 6	106	3059101	3058995	142	116883	116741	3.81632		1.98522
RT/ser 1	163	3010766	3010603	101	3850810	3850709	127.905	192.237
RT/ser 2	157	3943503	3943346	105	8156477	8156372	206.839
RT/ser 3	113	3455017	3454904	146	7469198	7469052	216.187
RT/ser 4	124	2016140	2016016	87	4787490	4787403	237.469
RT/ser 5	115	2923836	2923721	105	6059128	6059023	207.237
RT/ser 6	145	2302548	2302403	112	3632982	3632870	157.786
UGA/am 1	123	3680166	3680043	132	230100	229968	6.24906		3.58014	2.75095	0.587265	0.23975
UGA/am 2	151	5032028	5031877	178	167373	167195	3.32272		1.90362
UGA/am 3	160	4113475	4113315	129	162871	162742	3.95647		2.2667
UGA/am 4	108	5067605	5067497	128	257736	257608	5.08354		2.9124
UGA/am 5	113	4510484	4510371	155	229433	229278	5.08335		2.9123
UGA/am 6	138	4356863	4356725	133	222990	222857	5.11524		2.93057
UGA_U/am 1	153	3009371	3009218	110	59350	59240	1.96862		1.12784	2.11183	0.63476	0.25914
UGA_U/am 2	126	3033884	3033758	108	90980	90872	2.99536		1.71607
UGA_U/am 3	95	2416470	2416375	124	126909	126785	5.24691		3.006
UGA_U/am 4	133	2292852	2292719	109	92086	91977	4.0117		2.29834
UGA_U/am 5	106	1921073	1920967	139	78413	78274	4.07472		2.33444
UGA_U/am 6	111	1762343	1762232	179	67490	67311	3.81964		2.18831
RT/am 1	117	900100	899983	118	1077284	1077166	119.687	174.548
RT/am 2	201	1384352	1384151	156	2013916	2013760	145.487
RT/am 3	173	728637	728464	96	1248320	1248224	171.35
RT/am 4	113	1542975	1542862	103	3413153	3413050	221.216
RT/am 5	118	696898	696780	147	1340242	1340095	192.327
RT/am 6	133	1121071	1120938	108	2210814	2210706	197.219
UGA/op 1	124	3574358	3574234	130	284424	284294	7.95398		5.46908	3.66235	1.1254	0.459442
UGA/op 2	111	4089919	4089808	109	160091	159982	3.91172		2.24106
UGA/op 3	187	4572304	4572117	144	252271	252127	5.51445		3.15928
UGA/op 4	182	4754404	4754222	131	258358	258227	5.43153		3.11177
UGA/op 5	122	5088716	5088594	134	387663	387529	7.61564		4.36307
UGA/op 6	128	4220923	4220795	152	267571	267419	6.33575		3.62981
UGA_U/op 1	129	3788304	3788175	108	233031	232923	6.14869		3.52264	4.75047	0.969972	0.39599
UGA_U/op 2	109	4253792	4253683	146	442570	442424	10.401		5.95881
UGA_U/op 3	125	2615852	2615727	111	264372	264261	10.1028		5.78797
UGA_U/op 4	126	5485433	5485307	115	464982	464867	8.47477		4.85527
UGA_U/op 5	147	3241326	3241179	120	231620	231500	7.14246		4.09198
UGA_U/op 6	138	2362396	2362258	158	176888	176730	7.4814		4.28616
RT/op 1	108	4402695	4402587	114	4559301	4559187	103.557	145.436
RT/op 2	164	3329940	3329776	168	3935310	3935142	118.18
RT/op 3	130	3117006	3116876	86	4360683	4360597	139.903
RT/op 4	134	2381033	2380899	146	2670066	2669920	112.139
RT/op 5	151	1769441	1769290	131	4124553	4124422	233.112
RT/op 6	111	1482213	1482102	133	2456311	2456178	165.723
